# Supplementary material for: Changing incidence of bovine babesiosis in Ireland
Source: PubMed Central journal article supplement (PMC4179216; doi:10.1186/2046-0481-67-19), 2014-09-05
Supplement: 2046-0481-67-19-S2.pdf [file 2046-0481-67-19-S2.pdf]

### 1. Location of your practice:

Town

County

### 2. Roughly how many cases of bovine babesiosis (redwater) did you attend in the last 12 months?

### 3. At what time of year did they mostly occur?

- Mainly in the spring
- Mainly in the summer
- Mainly in the autumn
- Mainly in the winter
- At any time of year

Other (please specify)

### 4. Approx how many of these cases:

a) Needed to be revisited?

b) Required blood transfusions?

c) Resulted in mortalities?

COMMENTS

### 5. What were the chief presenting clinical signs?

|                             | most often            | sometimes             | rarely                | never                 |
|-----------------------------|-----------------------|-----------------------|-----------------------|-----------------------|
| Haemoglobinuria (redwater)  | <input type="radio"/> | <input type="radio"/> | <input type="radio"/> | <input type="radio"/> |
| Fever                       | <input type="radio"/> | <input type="radio"/> | <input type="radio"/> | <input type="radio"/> |
| Jaundice                    | <input type="radio"/> | <input type="radio"/> | <input type="radio"/> | <input type="radio"/> |
| Diarrhoea                   | <input type="radio"/> | <input type="radio"/> | <input type="radio"/> | <input type="radio"/> |
| Constipation                | <input type="radio"/> | <input type="radio"/> | <input type="radio"/> | <input type="radio"/> |
| Rapid breathing (tachypnea) | <input type="radio"/> | <input type="radio"/> | <input type="radio"/> | <input type="radio"/> |
| Increased heart rate        | <input type="radio"/> | <input type="radio"/> | <input type="radio"/> | <input type="radio"/> |
| Edema of the brisket        | <input type="radio"/> | <input type="radio"/> | <input type="radio"/> | <input type="radio"/> |

Other (please specify)

**6. Do you think there has there been a change in the number of clinical babesiosis cases in the last 10 years?**

- Yes, they have increased
- Yes, they have decreased
- No, they have not changed
- Don't know

Comment

**7. Do you think there has there been a change in the severity of bovine babesiosis cases in the last 10 years?**

- Yes, infections tend to be more severe
- Yes, infections tend to be less severe
- No, the severity has not changed
- Don't know

Comment

**8. How are most cases of bovine babesiosis diagnosed? Please rank according to your experience**

|                                            | most often            | sometimes             | rarely                | never                 |
|--------------------------------------------|-----------------------|-----------------------|-----------------------|-----------------------|
| Case history                               | <input type="radio"/> | <input type="radio"/> | <input type="radio"/> | <input type="radio"/> |
| Previous history of babesiosis on the farm | <input type="radio"/> | <input type="radio"/> | <input type="radio"/> | <input type="radio"/> |
| Treatment success                          | <input type="radio"/> | <input type="radio"/> | <input type="radio"/> | <input type="radio"/> |
| Blood smear (in-house)                     | <input type="radio"/> | <input type="radio"/> | <input type="radio"/> | <input type="radio"/> |
| Referral to a regional laboratory          | <input type="radio"/> | <input type="radio"/> | <input type="radio"/> | <input type="radio"/> |

Other (please specify)

**9. How effective is treatment of bovine babesiosis with imidocarb dipropionate (Imizol)?**

- Highly effective
- Effective
- Not effective
- Not at all effective
- Don't know

Comment

**10. Do you use Imizol prophylactically?**

- Yes
- No

**11. If yes, how effective is the drug as a prophylactic agent?**

- Highly effective
- Effective
- Not effective
- Not at all effective

**12. Do you use any other drugs as prophylactic agents against bovine babesiosis? If yes, please specify:**

**13. Would you be amenable to receive an email seeking further information? If yes, please provide your name and contact details:**

Name

Email/Telephone

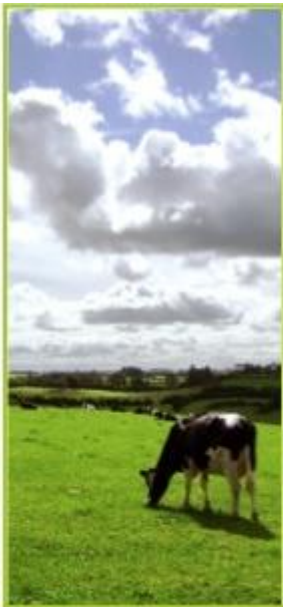

**Many thanks for taking the time to complete this survey!**
